# Supplementary material for: Copy number gain of granulin-epithelin precursor (GEP) at chromosome 17q21 associates with overexpression in human liver cancer
Source: BMC Cancer. 2015 Apr 11;15:264. doi: 10.1186/s12885-015-1294-x (PMC4403714; doi:10.1186/s12885-015-1294-x)
Supplement: Additional file 1: Figure S1. — PCR efficiencies. Serial dilutions of template DNA was used for the PCR. The CT values were plotted against the amount of DNA used. Both assays showed efficiencies close to 100%, denoted that the PCR products were amplified with a factor close to 2 in each cycle. [file 12885_2015_1294_MOESM1_ESM.pdf]

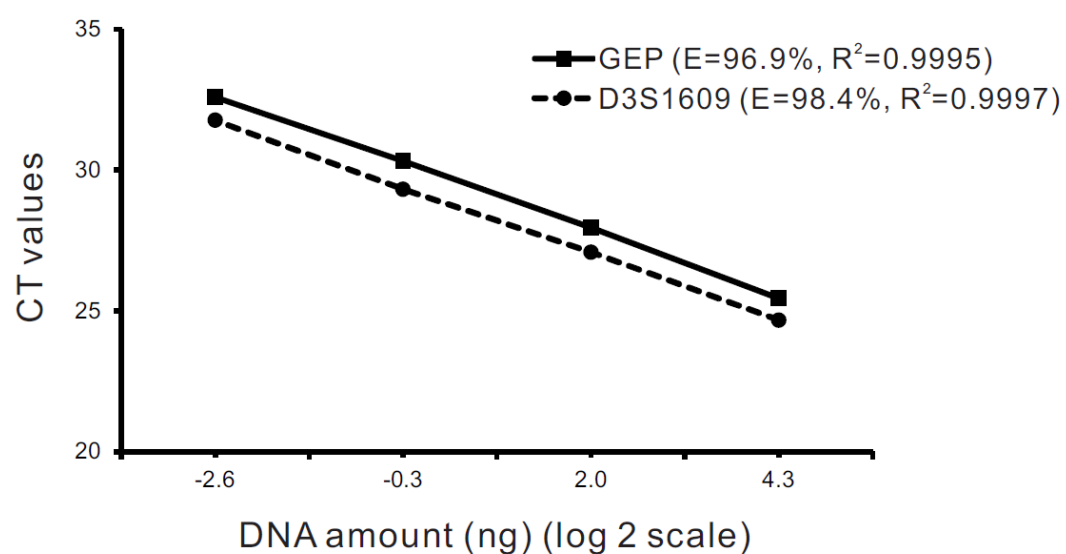

**Supplementary Figure 1. PCR efficiencies.** Serial dilutions of template DNA was used for the PCR. The CT values were plotted against the amount of DNA used. Both assays showed efficiencies close to 100%, denoted that the PCR products were amplified with a factor close to 2 in each cycle.
